# Supplementary material for: Integrative proteo-transcriptomic and immunophenotyping signatures of HIV-1 elite control phenotype: A cross-talk between glycolysis and HIF signaling
Source: iScience. 2021 Dec 10;25(1):103607. doi: 10.1016/j.isci.2021.103607 (PMC8718889; doi:10.1016/j.isci.2021.103607)
Supplement: Document S1. Figures S1–S6 and Tables S1 and S3 [file mmc1.pdf]

## **Supplemental information**

### **Integrative proteo-transcriptomic and immunophenotyping**

#### **signatures of HIV-1 elite control phenotype:**

#### **A cross-talk between glycolysis and HIF signaling**

**Sara Svensson Akusjärvi, Anoop T. Ambikan, Shuba Krishnan, Soham Gupta, Maike Sperk, Ákos Végvári, Flora Mikaeloff, Katie Healy, Jan Vesterbacka, Piotr Nowak, Anders Sönnernborg, and Ujjwal Neogi**

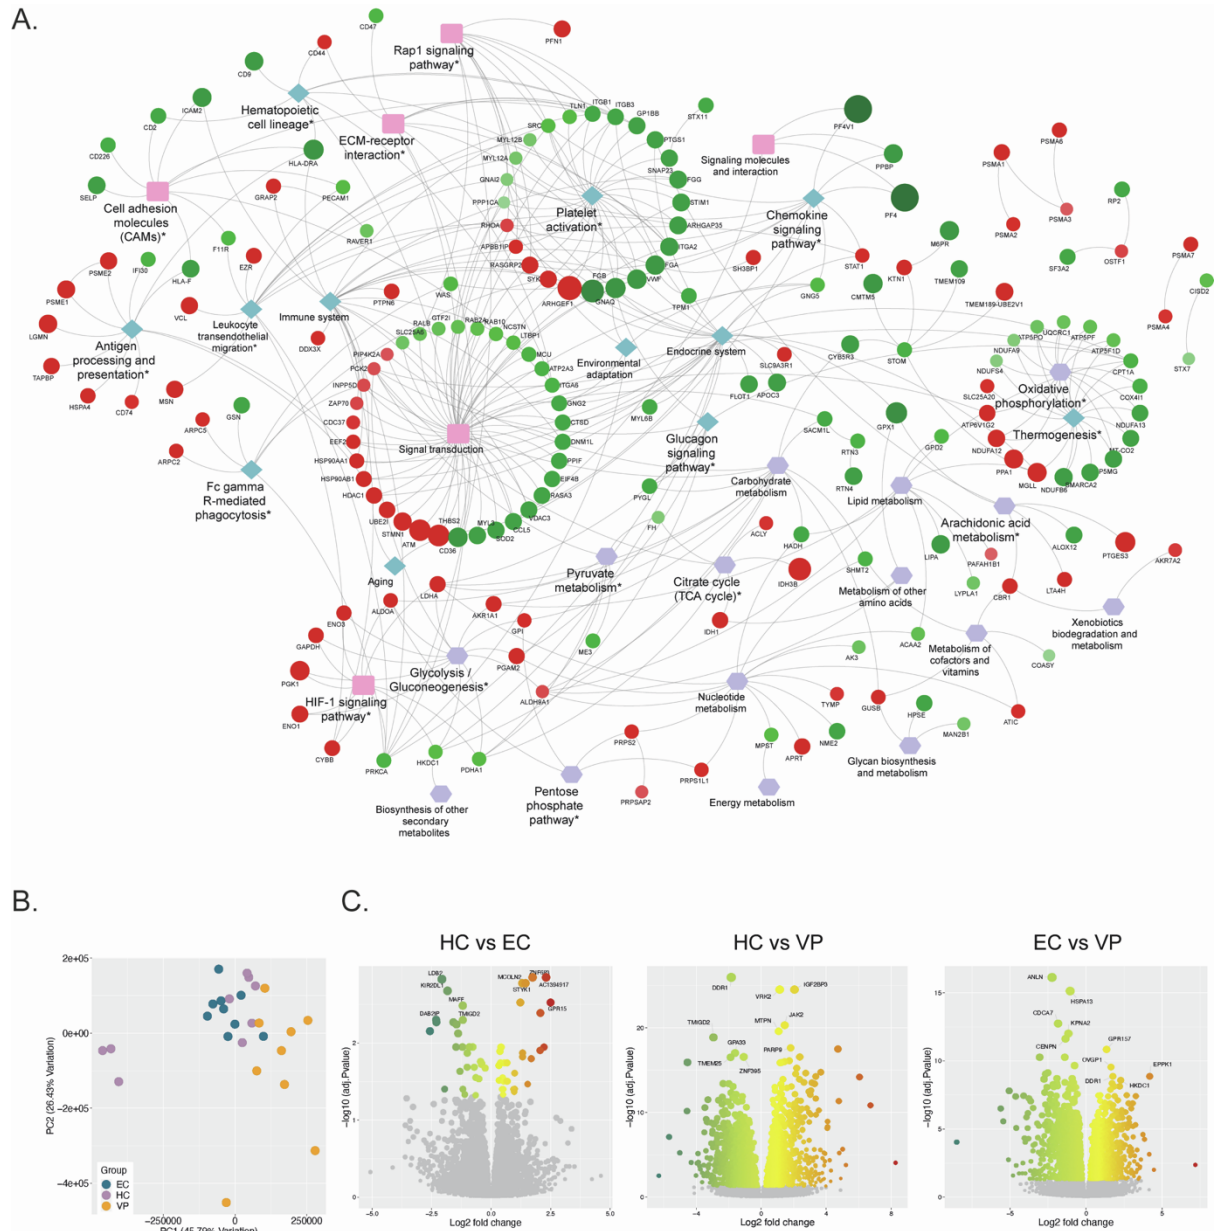

**Figure S1** Identified feature of individual omics level analysis of male EC ( $n=9$ ), VP ( $n=9$ ) and HC ( $n=9$ ). Related to Figure 1. **(A)** Network analysis of identified proteomic features in EC compared to HC. Red denotes significantly upregulated proteins and green denotes significantly downregulated proteins in EC from Figure 1C. **(B)** PCA plots of transcriptomic data from males. **(C)** Differential gene expression analysis of transcriptomic data in males between HC and EC, HC and VP, and EC and VP.

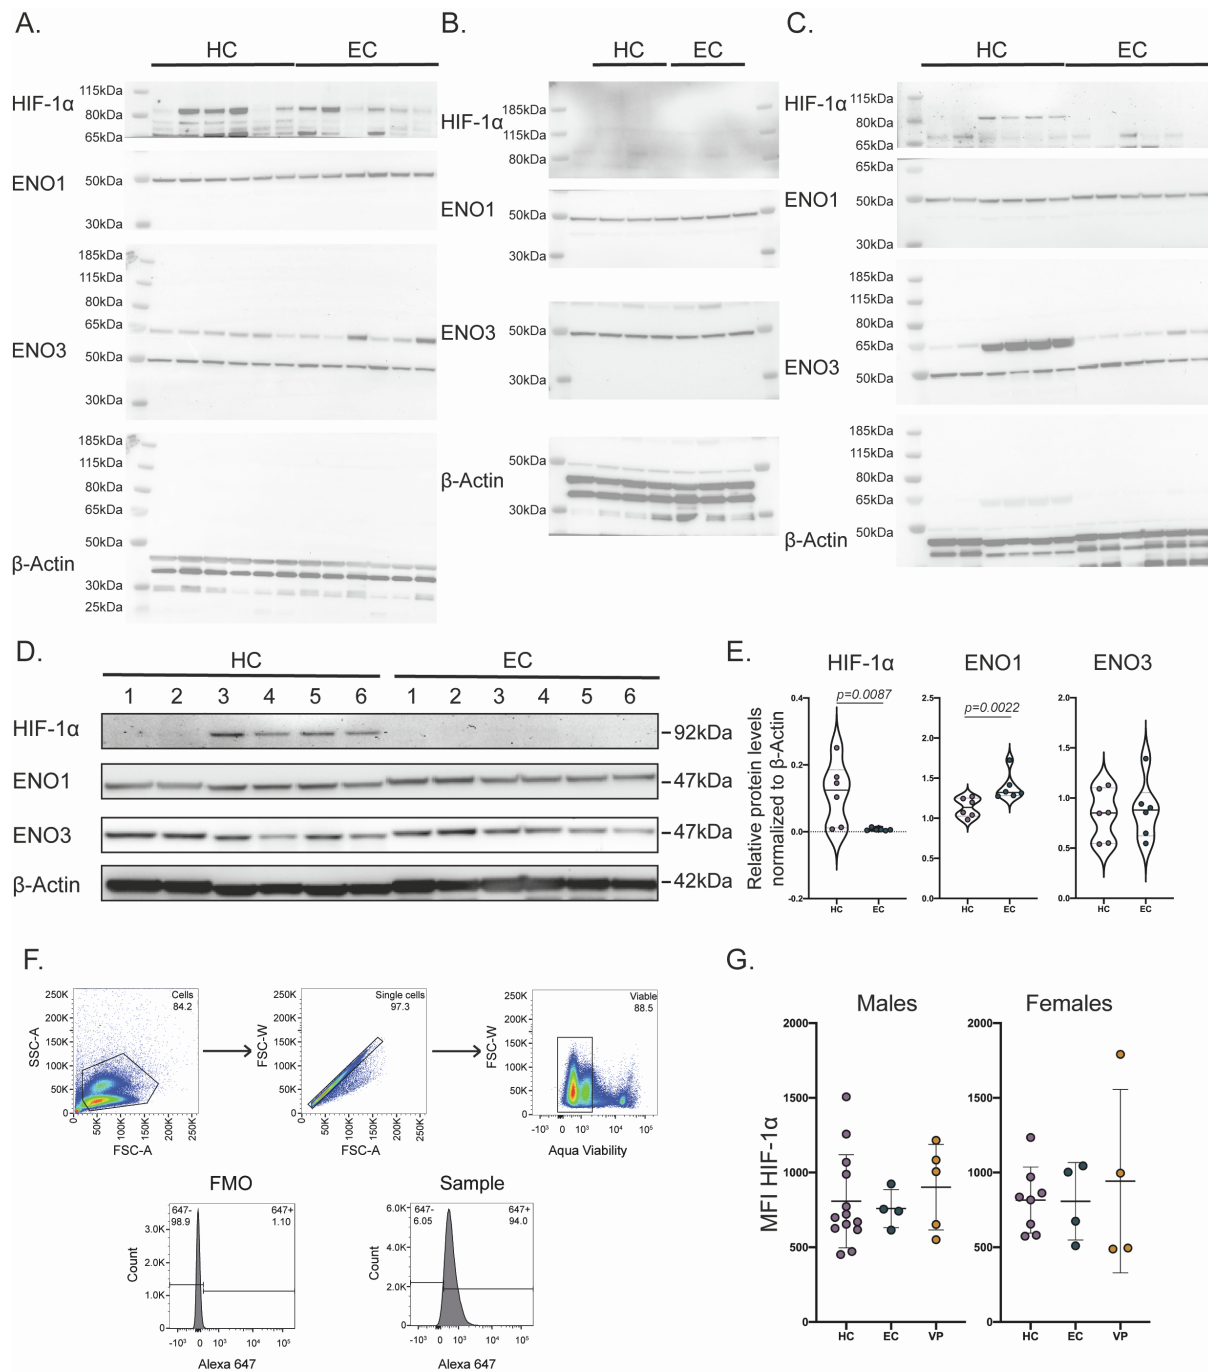

**Figure S2** Protein detection of HIF-1α together with HIF target protein ENO1 and ENO3 detected as upregulated in the proteo-transcriptomic analysis in male. Related to Figure 2. (**A-C**) Raw western blot membranes for HIF-1α, ENO1, and ENO3 and β-Actin detection for male HC ( $n=6$ ) and EC ( $n=6$ ) (**A**), additional male HC ( $n=3$ ) and EC ( $n=3$ ) (**B**) and female HC ( $n=6$ ) and EC ( $n=6$ ) (**C**). (**D**) Western blot image showing the protein expression in HC ( $n=6$ ) and EC ( $n=6$ ) in females. (**E**) Relative protein quantification of HIF-1α, ENO1, and ENO3 normalized to β-Actin in females. (**F-H**) Flow cytometry analysis of HIF-1α in PBMCs of HC ( $n=21$ ), EC ( $n=8$ ), and VP ( $n=9$ ). (**F**) Gating strategy showing fluorescence minus one (FMO) and sample acquisition. (**G**) Median fluorescence intensity (MFI) of HIF-1α in positive cells in males and females separately. Statistical significance was evaluated using Mann-Whitney U-test (significance level,  $p<0.05$ ) and data represented as violin plots or median with 95% CI.

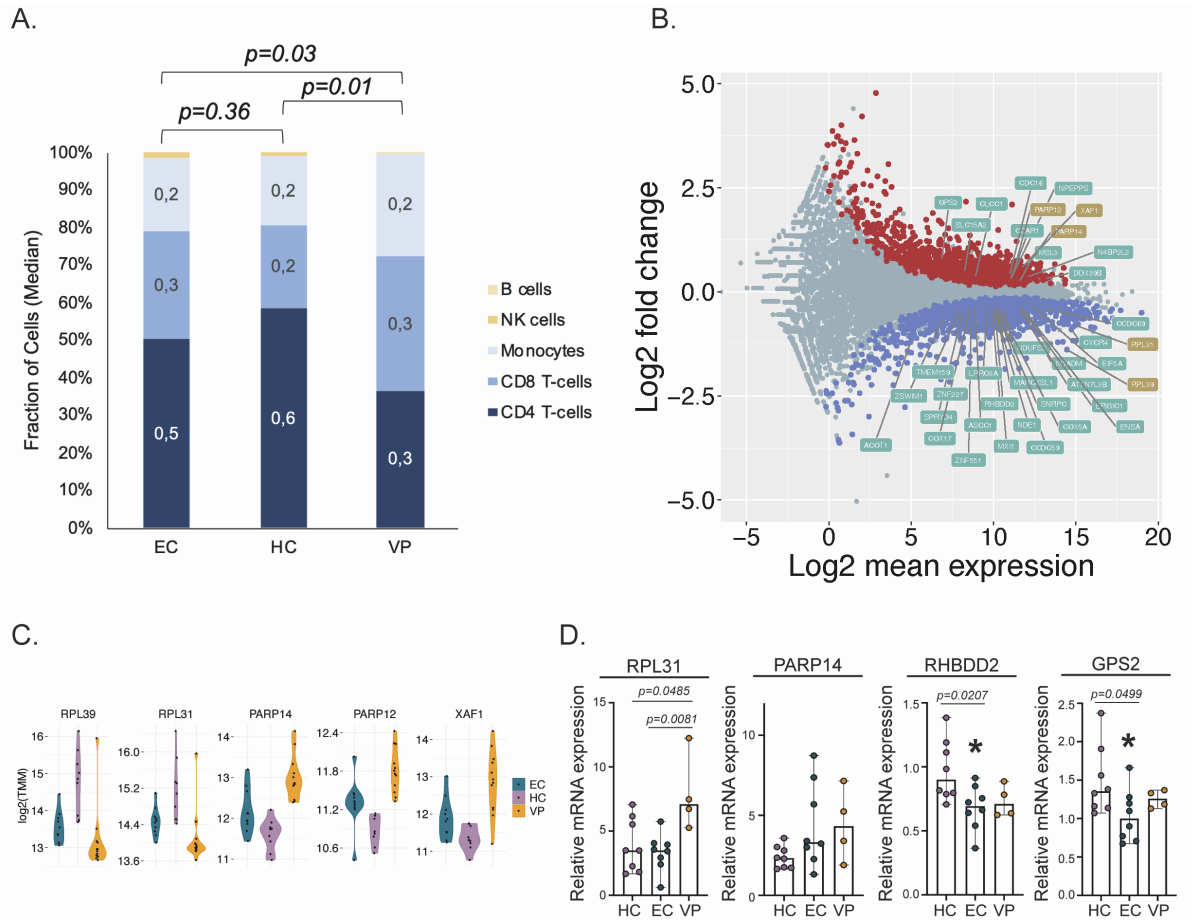

**Figure S3** Detection of HIF-1 target genes. Related to Figure 3. **(A)** EPIC analysis on bulk gene expression data identifying fractions of cell types within EC ( $n=9$ ), VP ( $n=9$ ) and HC ( $n=9$ ). **(B)** Differential gene expression of HIF-1 target genes in EC compared to HC. Red denotes genes that are statistically increased while blue denotes genes that are statistically decreased in EC compared to HC. **(C)** Violin plot of the significantly expressed genes between all the comparisons in Figure 3C. **(D)** Validation by qPCR in female HC ( $n=8$ ), EC ( $n=8$ ) and VP ( $n=4$ ) of RPL31, PARP14, RHBDD2, and GPS2. Statistical significance was evaluated using Mann-Whitney U-test (significance level,  $p<0.05$ ) and data represented as median with 95% CI.

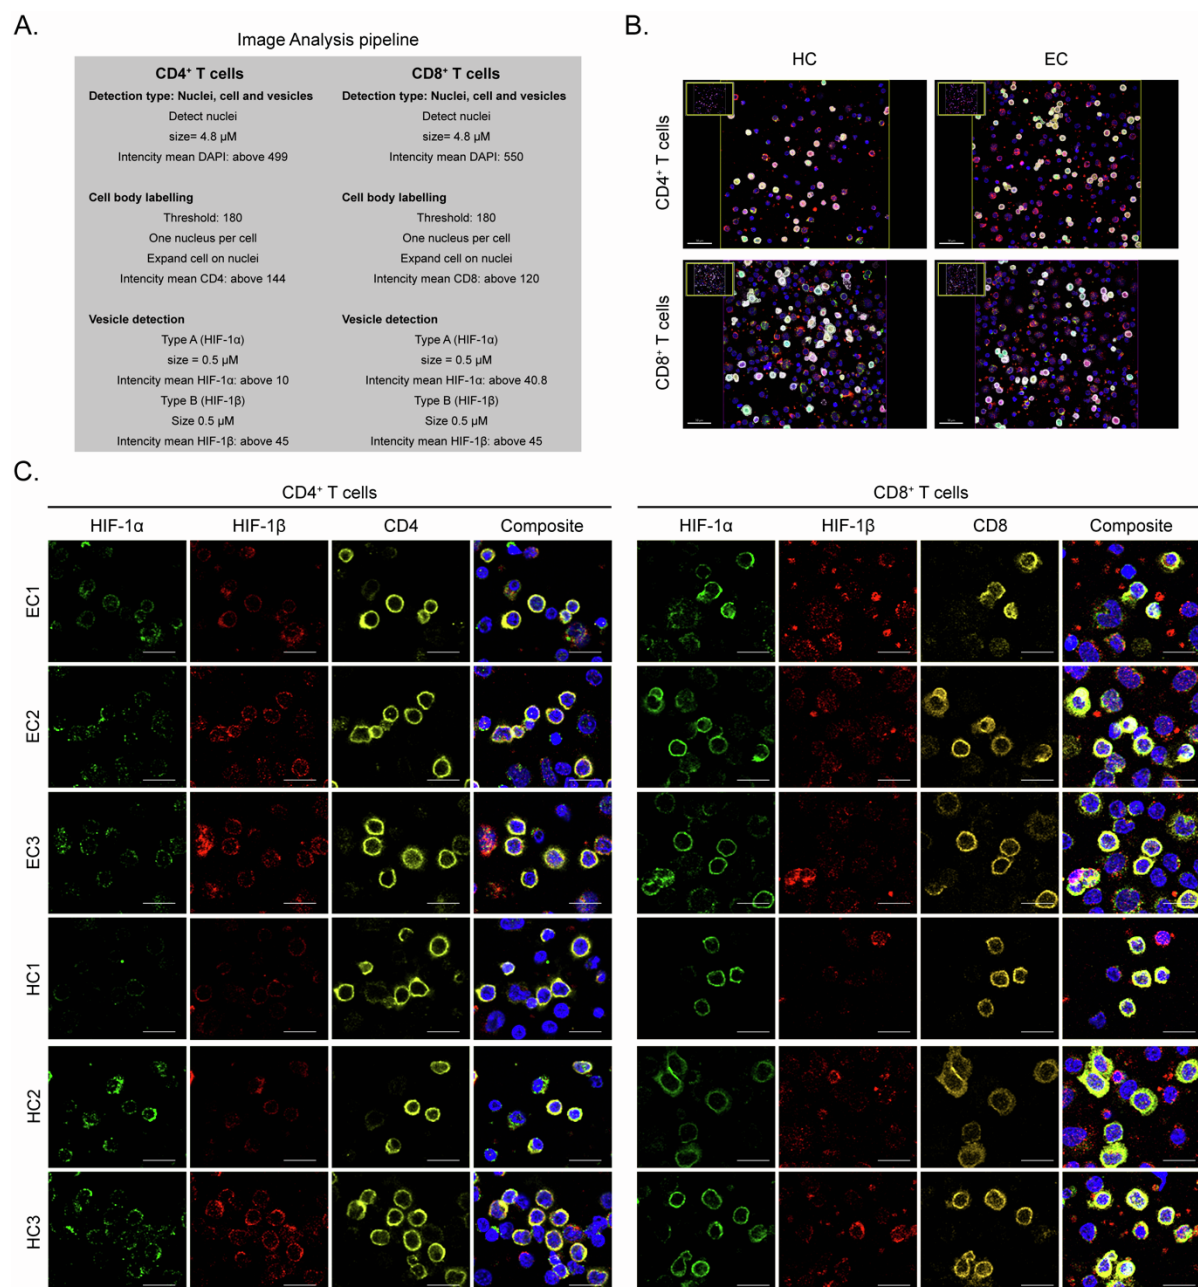

**Figure S4** Immunofluorescence analysis of HIF-1 $\alpha$  and HIF-1 $\beta$  localization in CD4<sup>+</sup> and CD8<sup>+</sup> T cells. Related to Figure 3. **(A)** Image analysis pipeline of CD4<sup>+</sup> and CD8<sup>+</sup> T cells expressing HIF-1 $\alpha$  and HIF-1 $\beta$  in Imaris. **(B)** Representative images of HIF-1 $\alpha$  and HIF-1 $\beta$  detection in CD4<sup>+</sup> and CD8<sup>+</sup> T cells of male HC ( $n=3$ ) and EC ( $n=3$ ) donors. Scale bar represents 30 $\mu$ M **(C)** Detection of HIF-1 $\alpha$  and HIF-1 $\beta$  by IF in CD4<sup>+</sup> and CD8<sup>+</sup> T cells in EC ( $n=3$ ) and HC ( $n=3$ ) by immunofluorescence. Scale bar represents 10 $\mu$ M.

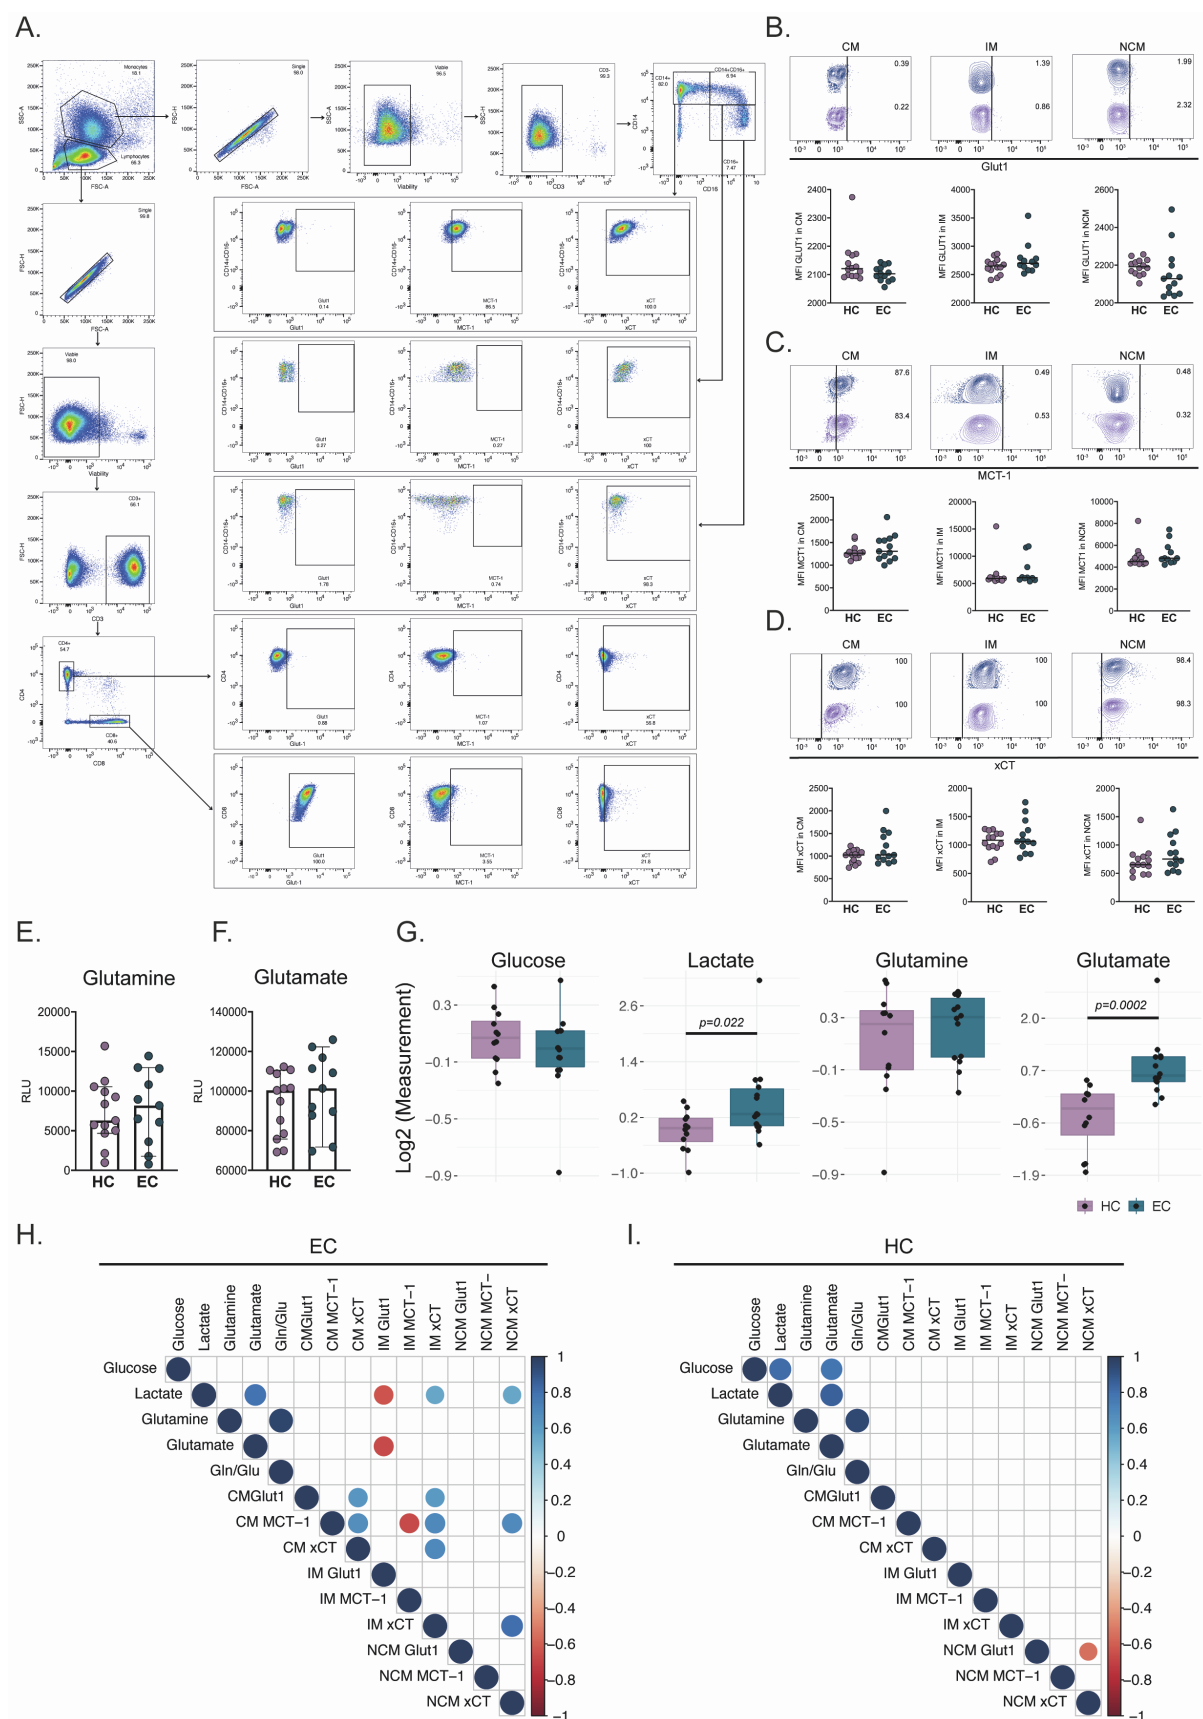

**Figure S5** Metabolite uptake and release analysis in EC ( $n=13$ ) and HC ( $n=14$ ). Related to Figure 4. (A) Gating strategy of flow cytometry analysis of metabolite transporter expression

in lymphocytes (CD4<sup>+</sup>, CD8<sup>+</sup>) and monocytes (classical (CM), intermediate (IM), and non-classical (NCM)). (**B**) Transporter expression of Glut1 on CM, IM, and NCM. (**C**) Transporter expression of MCT-1 on CM, IM, and NCM. (**D**) Transporter expression of xCT on CM, IM, and NCM. Contour plots shows a representing image of median % of cells expressing transporters and figures show median fluorescence intensity (MFI) (**B-D**). (**E, F**) Intracellular metabolite levels of glutamine (**E**) and glutamate (**F**). (**G**) Plasma metabolites of glutamate, glutamine, lactate, and glucose in EC ( $n=14$ ) and HC ( $n=12$ ). (**H, I**) Correlation matrix of intracellular levels of metabolites with their corresponding transporter in EC ( $n=13$ ) (**H**) and HC ( $n=14$ ) (**I**). Significance was evaluated using Mann-Whitney U-test (significance level,  $p<0.05$ ) and represented using median with 95% CI. Correlation analysis was performed using Spearman correlation (significance level,  $p<0.05$ ).

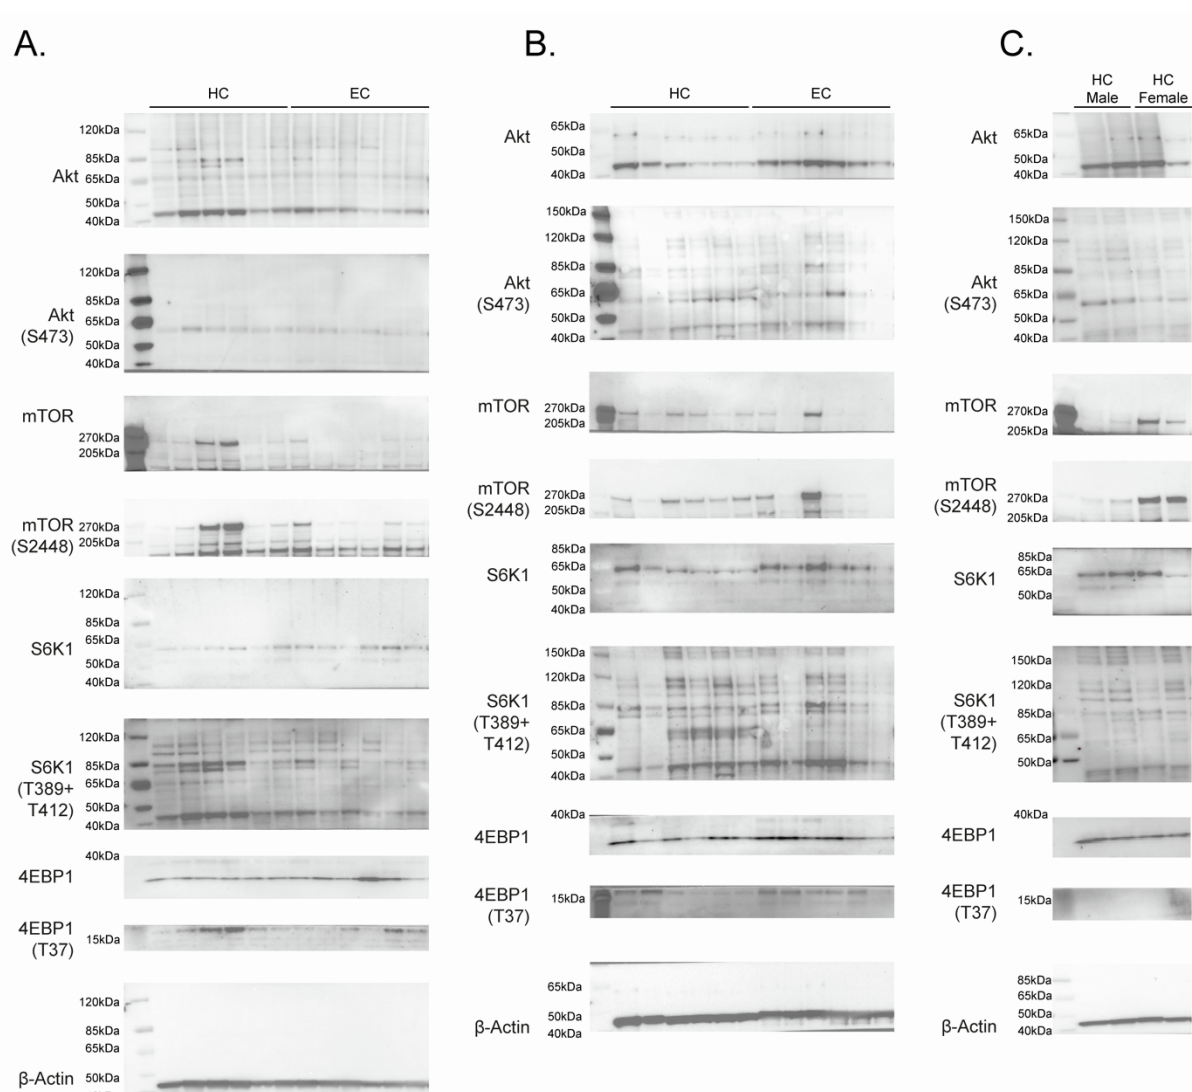

**Figure S6** Raw western blot membranes for Akt, Akt (S473), mTOR, mTOR (S2448), S6K1, S6K1 (T389+T412), 4EBP1, 4EBP1 (T37), and  $\beta$ -Actin. Related to Figure 5. (A, B) Whole membranes of male HC ( $n=6$ ) and EC ( $n=6$ ) (A) and female HC ( $n=6$ ) and EC ( $n=6$ ) (B). (C) Additional membrane of male ( $n=2$ ) and female ( $n=2$ ) HC.

**Table S1** Characteristics of patient cohort. Related to STAR Methods.

| Parameter                                            | EC          | VP          | HC         | P-values             |
|------------------------------------------------------|-------------|-------------|------------|----------------------|
| <i>N</i>                                             | 19          | 19          | 19         | NA                   |
| Sex, Female, N (%)                                   | 9 (47.4%)   | 7 (36.9%)   | 10 (52.6%) |                      |
| <b>At sampling</b>                                   |             |             |            |                      |
| Years of HIV <sup>+</sup> diagnosis;<br>median (IQR) | 11.7 (9)    | 0 (0-0)     | -          | <0.0001 <sup>#</sup> |
| Age in years, mean (SD)                              | 46.5 (9.8)  | 44.7 (13.3) | 47.4 (8.5) | 0.3219 <sup>*</sup>  |
| CD4 count (cells/ $\mu$ L); median (IQR)             | 880 (450)   | 330 (180)   | -          | <0.0001 <sup>#</sup> |
| CD8 count (cells/ $\mu$ L); median (IQR)             | 660 (640)   | 610 (490)   | -          | 0.9675 <sup>#</sup>  |
| CD4:CD8 ratio, median (IQR)                          | 1.21 (0.77) | 0.32 (0.39) | -          | <0.0001 <sup>#</sup> |
| Viral Load Log <sub>10</sub> copies/mL (IQR)         | 0 (1.51)    | 4.89 (1.17) | -          | <0.0001 <sup>#</sup> |

NA, Not Applicable; U, Unavailable; <sup>\*</sup> One way-Anova; <sup>#</sup>Mann-Whitney U-test

**Table S3** List of primer sequences for qPCR. Related to STAR Methods.

| Target | Primer sequence                                                  |
|--------|------------------------------------------------------------------|
| RHBDD2 | F (5'-GGTGTTTGGCATGGTTGTG-3')<br>R (5'-CGATGGAATAGCAGTAGGTGA-3') |
| GPS2   | F (5'-ACCCGCGATTCTACCACAAG-3')<br>R (5'-CTGGGACACACAGGGGATAC-3') |
| RPL31  | F (5'-CAGAATGGCTCCCGCAA-3')<br>R (5'-TGGCAGAACGGCCCTTT-3')       |
| PARP14 | F (5'-TGCCAAGAATGGCCAGACAA-3')<br>R (5'-GGCATAGCTGCGGTAAAGC-3')  |
| Actin  | F (5'-GAGGGAAATCGTGCGTGACA-3')<br>R (5'-AATAGTGATGACCTGGCCGT-3') |
